# Supplementary material
Source: HighWire-hosted journal article supplement (https://jnnp.bmj.com/content/jnnp-2019-322038)
Supplement: inline-supplementary-material-1 [file inline-supplementary-material-1.pdf]

## Supplementary

**Table S1. Baseline demographics of antidopaminergic medication takers and non-antidopaminergic prior to propensity score matching.**

|                                          | <b>HD controls (non-antidopaminergic takers)<br/>(n= 2254)</b> | <b>HD antidopaminergic takers<br/>(n=2676)</b> |
|------------------------------------------|----------------------------------------------------------------|------------------------------------------------|
| Age<br>(years)                           | 52.6<br>(12.1)                                                 | 53.7*<br>(11.7)                                |
| CAG repeat length                        | 43.5<br>(3.2)                                                  | 43.7*<br>(2.9)                                 |
| Disease burden score<br>(DBS)            | 391.9<br>(97.4)                                                | 412.7***<br>(85.4)                             |
| Total Functional capacity score<br>(TFC) | 9.2<br>(3.3)                                                   | 7.9***<br>(3.3)                                |
| Time since diagnosis<br>(years)          | 3.9<br>(5.4)                                                   | 4.6***<br>(4.7)                                |
| Irritability<br>(PBA)<br>Max score 32    | 3<br>(4.6)                                                     | 3.5***<br>(5.1)                                |
| Depression<br>(PBA)<br>Max score 48      | 4.8<br>(6.1)                                                   | 5.6***<br>(6.5)                                |
| Apathy<br>(PBA)<br>Max score 16          | 2.6<br>(4)                                                     | 4.1***<br>(4.5)                                |
| Total motor score UHDRS<br>Max score 124 | 31.5<br>(20.3)                                                 | 38.7***<br>(18.5)                              |
| Total chorea score UHDRS<br>Max score 28 | 7.8<br>(5)                                                     | 9.6***<br>(5.3)                                |
| MMSE<br>Max score 30                     | 25.8<br>(4.4)                                                  | 24.8***<br>(4)                                 |
| Composite cognitive Z-score              | 1.4<br>(6.5)                                                   | -1.2***<br>(5.5)                               |

\*Indicates a significant difference ( $p<0.005$ ) when compared with the control non- antidopaminergic medication group. \*\*\* Indicates a significant difference ( $p<0.001$ ) when compared with the control non-antidopaminergic medication group.

**Table S2. Motor, psychiatric and cognitive assessments. Average annual mean change in score (standard deviation in brackets.)**

|                                | Non-antidopaminergic<br>Medication<br>Takers<br><br>(n= 2136) | Antidopaminergic<br>Medication<br>Takers<br><br>(n= 2578) | <i>p</i> |
|--------------------------------|---------------------------------------------------------------|-----------------------------------------------------------|----------|
| UHDRS total motor score        | 3.4<br>(7.3)                                                  | 3.9<br>(7.9)                                              | .125     |
| UHDRS total chorea score       | -1.3<br>(4.8)                                                 | -.0.2<br>(3.1)                                            | .001     |
| Irritability (PBA)             | -0.1<br>(3.1)                                                 | -0.4<br>(3.4)                                             | 0.16     |
| Depression (PBA)               | -0.3<br>(4.5)                                                 | -0.4<br>(5)                                               | .928     |
| Apathy (PBA)                   | 0.2<br>(3.2)                                                  | 0.4<br>(3.3)                                              | .363     |
| Composite cognitive Z-score    | 0.5<br>(3.8)                                                  | -0.4<br>(3.9)                                             | <0.001   |
| Symbol Digit Modalities (SDMT) | -1.2<br>(4.1)                                                 | -2.2<br>(4.2)                                             | <0.001   |
| Verbal fluency                 | -0.6<br>(2.8)                                                 | -1<br>(2.6)                                               | <0.001   |
| Stroop naming                  | -2.9<br>(8.6)                                                 | -3.9<br>(8.9)                                             | <0.001   |
| Stroop word                    | -3<br>(9.6)                                                   | -4.6<br>(10.2)                                            | <0.001   |
| Stroop Interference            | -1.8<br>(5.9)                                                 | -2.1<br>(5.4)                                             | .029     |
| Trail Making A score           | .01<br>(6.1)                                                  | -0.5<br>(3.5)                                             | .093     |
| Trail Making A time            | 3.8<br>(25.1)                                                 | 8.3<br>(30.5)                                             | .015     |
| Trail Making B score           | -1.4<br>(7.7)                                                 | -1.7<br>(6)                                               | .732     |
| Trail Making B time            | 3.8<br>(34.3)                                                 | 8.6<br>(37.4)                                             | .001     |
| MMSE                           | -0.5<br>(2.1)                                                 | -0.7<br>(2.4)                                             | .778     |

\*Indicates a significant difference ( $p<0.005$ ) when compared with the control non- antidopaminergic medication group. \*\*\* Indicates a significant difference ( $p<0.001$ ) when compared with the control non-antidopaminergic medication group.

**Table S3. Reason for being prescribed antidopaminergic medication, showing number of participants with percentage in brackets**

|                                            | HD antidopaminergic medication takers (n=466) | Pre and post antidopaminergic treatment (n=90) |
|--------------------------------------------|-----------------------------------------------|------------------------------------------------|
| Movement disorder                          | 312 (67%)                                     | 52 (57.8%)                                     |
| Chorea                                     | 209                                           | 38                                             |
| Dyskinesia                                 | 69                                            | 12                                             |
| Movement disorder (type not specified)     | 34                                            | 2                                              |
| Mood disorder                              | 130 (28%)                                     | 34 (37.8%)                                     |
| Irritability/ anger/ agitation/ aggression | 43                                            | 12                                             |
| Depression/ affective disorder             | 31                                            | 6                                              |
| Anxiety                                    | 13                                            | 5                                              |
| Psychotic disorder (type not specified)    | 20                                            | 3                                              |
| Other mood disorder                        | 23                                            | 8                                              |
| Insomnia/ sleep disorder                   | 18 (4%)                                       | 2 (2.2%)                                       |
| Other                                      | 7 (1%)                                        | 2 (2.2%)                                       |

**Table S4. Group1. Baseline score for each cognitive task per group (standard deviation in brackets with range below)**

|                                                | HD controls (non-antidopaminergic takers) (n= 466) | HD antidopaminergic takers (n=466) |
|------------------------------------------------|----------------------------------------------------|------------------------------------|
| Composite cognitive Z-score                    | 1.3 (5.3)<br>-21.7 - 18.9                          | -1.3 (5.8)<br>-32.4 – 16.7         |
| Symbol Digit Modality (SDMT)<br>Max score 110  | 28 (10.5)<br>4-69                                  | 23.1* (10.4)<br>0-65               |
| Verbal Fluency<br>Max score 32                 | 14.3 (5)<br>2-42                                   | 12.4* (4.9)<br>1-32                |
| Stroop Naming                                  | 48.4 (13.8)<br>11-130                              | 41.6* (14.2)<br>11-97              |
| Stroop Word                                    | 63.9 (18.4)<br>12-120                              | 56.6* (19.2)<br>0-125              |
| Stroop interference                            | 27.3 (10.8)<br>1-74                                | 22.6* (9.8)<br>0-62                |
| Trail Making A score<br>Max score 25           | 24.9 (1.5)<br>0 -25                                | 24.7 (2.4)<br>0-25                 |
| Trail Making A time (seconds)<br>Max time 240s | 54.3 (30.3)<br>16-240                              | 65.4* (39.3)<br>4-240              |

|                                                   |                        |                        |
|---------------------------------------------------|------------------------|------------------------|
| Trail Making B score<br>Max score 25              | 23.6 (13)<br>0-25      | 21.3* (7)<br>0-25      |
| Trail Making B time<br>(seconds)<br>Max time 240s | 136.7 (68.3)<br>18-240 | 150.5* (69.7)<br>0-240 |

\*Indicates a significant difference ( $p < 0.001$ ) when compared with the control non-antidopaminergic medication group

**Table S5. Group2. Baseline score for each cognitive task per group (standard deviation in brackets with range below)**

|                                                   | <b>Control group (those not taking dopamine medication but assessed at the same time intervals) (n=103)</b> | <b>Pre and post antidopaminergic treatment group (n=90)</b> |
|---------------------------------------------------|-------------------------------------------------------------------------------------------------------------|-------------------------------------------------------------|
| Composite cognitive Z-score                       | 1.5 (5.4)<br>-11.2 - 15.8                                                                                   | -1.7*** (4.8)<br>-19.2 - 11.3                               |
| Symbol Digit Modality (SDMT)<br>Max score 110     | 30.5 (12.1)<br>0-59                                                                                         | 25.7* (10.7)<br>7-51                                        |
| Verbal Fluency<br>Max score 32                    | 14.5 (5.5)<br>0-27                                                                                          | 12.6* (4.6)<br>4-26                                         |
| Stroop Naming                                     | 51.8 (18.1)<br>0-100                                                                                        | 44.7* (15.5)<br>18-83                                       |
| Stroop Word                                       | 67.3 (23.4)<br>0-116                                                                                        | 56* (19.5)<br>18-100                                        |
| Stroop interference                               | 30.9 (11.5)<br>4-64                                                                                         | 24.1*** (9.9)<br>1-49                                       |
| Trail Making A score<br>Max score 25              | 25 (0.1)<br>24-25                                                                                           | 24.6 (3)<br>0-25                                            |
| Trail Making A time<br>(seconds)<br>Max time 240s | 47.2 (23.9)<br>18-180                                                                                       | 65* (39)<br>15-225                                          |
| Trail Making B score<br>Max score 25              | 23.4 (4.6)<br>0-25                                                                                          | 22.2* (5.7)<br>0-25                                         |
| Trail Making B time<br>(seconds)<br>Max time 240s | 115.9 (66.9)<br>24-240                                                                                      | 154.8* (66)<br>41-240                                       |

**Table S6. Average annual mean change in score (standard deviation in brackets) for each individual cognitive task per group.**

|                                | Non-antidopaminergic Medication Takers<br>(n= 466) | Antidopaminergic Medication Takers<br>(n= 466) | <i>p</i> | Cohen's <i>d</i> |
|--------------------------------|----------------------------------------------------|------------------------------------------------|----------|------------------|
| Composite cognitive Z-score    | 0.8<br>(3.5)                                       | -0.8***<br>(4.8)                               | <0.001   | 0.38             |
| Symbol Digit Modalities (SDMT) | -1.1<br>(3.8)                                      | -2.7<br>(4.6)                                  | <0.001   | 0.38             |
| Verbal fluency<br>Max score 32 | -0.6<br>(2.8)                                      | -1.3<br>(2.9)                                  | <0.001   | 0.25             |
| Stroop naming                  | -3.2<br>(7.7)                                      | -4.4<br>(7.6)                                  | 0.019    | 0.16             |
| Stroop word                    | -3.1<br>(9.2)                                      | -5.2<br>(9.5)                                  | <0.001   | 0.22             |
| Stroop Interference            | -1.8<br>(6)                                        | -2.3<br>(5.2)                                  | .029     | 0.09             |
| Trail Making A score           | -0.1<br>(1.6)                                      | -0.2<br>(2.9)                                  | 0.325    | 0.04             |
| Trail Making A time            | 2.4<br>(18.5)                                      | 8.8<br>(27.1)                                  | <0.001   | 0.28             |
| Trail Making B score           | -0.2<br>(3.4)                                      | -0.8<br>(4.6)                                  | 0.078    | 0.15             |
| Trail Making B time            | 4<br>(37.6)                                        | 9.5<br>(39.1)                                  | 0.070    | 0.14             |
| MMSE                           | -0.2<br>(1.8)                                      | -0.6<br>(2.2)                                  | 0.100    | 0.20             |

**Table S7. Group 2. Average annual mean change in score (standard deviation in brackets) for each individual cognitive task per group.**

|                                         | Control group<br>(Time 1)<br>(n=103) | Control group<br>(Time 2)<br>(n=103) | <i>p</i> | Cohen's<br>d | Pre<br>antidopaminergic<br>medication<br>(Time 1)<br>(n=90) | Post<br>antidopaminergic<br>Medication<br>(Time 2)<br>(n=90) | <i>p</i> | Cohen's<br>d |
|-----------------------------------------|--------------------------------------|--------------------------------------|----------|--------------|-------------------------------------------------------------|--------------------------------------------------------------|----------|--------------|
| Composite<br>cognitive<br>Z-score       | 0.4<br>(3.9)                         | -0.3<br>(4)                          | 0.1993   | 0.18         | 0.8<br>(3.4)                                                | -0.7***<br>(3.4)                                             | 0.001    | 0.44         |
| Symbol<br>Digit<br>Modalities<br>(SDMT) | -0.8<br>(5.3)                        | -2.3<br>(5.1)                        | 0.09     | 0.29         | -2.6<br>(5.8)                                               | -3.5<br>(6.6)                                                | 0.395    | 0.14         |
| Verbal<br>fluency                       | -0.4<br>(3.6)                        | -0.4<br>(3.8)                        | 0.8754   | 0            | 0.2<br>(4.7)                                                | -1.5<br>(3.9)                                                | 0.019    | 0.39         |
| Stroop<br>naming                        | -3.3<br>(8.2)                        | -2.6<br>(9.3)                        | 0.5947   | 0.08         | -1.7<br>(9.9)                                               | -2.2<br>(7.4)                                                | 0.710    | 0.06         |
| Stroop<br>word                          | -4.7<br>(9.4)                        | -6<br>(11.1)                         | 0.3923   | 0.13         | 0.2<br>(12.1)                                               | -3.9<br>(11.6)                                               | 0.038    | 0.35         |
| Stroop<br>Interference                  | -1.6<br>(6.7)                        | -2<br>(7)                            | 0.6841   | 0.06         | 1.3<br>(6.7)                                                | -2.7<br>(7.4)                                                | 0.004    | 0.57         |
| Trail<br>Making A<br>score              | 0.02<br>(0.1)                        | 0<br>(0)                             | 0.3215   | 0.01         | -0.02<br>(0.2)                                              | -0.5<br>(3)                                                  | 0.3487   | 0.23         |
| Trail<br>Making A<br>time<br>(seconds)  | -0.9<br>(19.2)                       | 2.3<br>(12.4)                        | 0.2616   | 0.20         | 0.8<br>(26)                                                 | 9.6<br>(18.4)                                                | 0.054    | 0.39         |
| Trail<br>Making B<br>score              | 0.5<br>(4.1)                         | 0.2<br>(2.6)                         | 0.6669   | 0.09         | 0.4<br>(5)                                                  | -2.3<br>(5.8)                                                | 0.040    | 0.50         |
| Trail<br>Making B<br>time<br>(seconds)  | 1.3<br>(55.3)                        | 11.7<br>(36.2)                       | 0.2292   | 0.22         | -5<br>(44.7)                                                | 17.3<br>(37.3)                                               | 0.026    | 0.50         |
| MMSE<br>Max score<br>30                 | -0.2<br>(2.2)                        | -0.3<br>(2)                          | 0.8248   | 0.05         | 0.3<br>(2.7)                                                | -0.8<br>(3.5)                                                | 0.241    | 0.35         |
